# Supplementary material
Source: publisher figshare collection journal article supplement (https://gsapubs.figshare.com/ndownloader/files/34804774)
Supplement: Supplementary file 1 [file 34804774]

Nawrot et al. 2021. Multiple phyla, one time resolution? Similar time averaging in benthic foraminifera, mollusk, echinoid, crustacean and otolith fossil assemblages
Appendix S1. Radiocarbon ages and calibration results for the analyzed specimens. Ages of Gouldia minima and Corbula gibba based on 14C-calibrated amino acid racemization published in Tomasovych et al. (2019) are also listed. All ages reported as years BP (relative to the year 1950 CE).
Lab.code	Specimen.ID	Station	Core	Sample	Max.depth.cm	Taxon	Size.mm	Mass.mg	AAR.age.BP	14C.age	14C.error	Median.calibrated.age.BP	One.Sigma.BP	Two.Sigma.BP
UAL21417	PIR2-30.Adel01	Piran 2	M53	25-30	30	Adelosina intricata	2.01	1.4	NA	4890	70	5065	5214 to 4933	5309 to 4819
UAL21418	PIR2-30.Adel02	Piran 2	M53	25-30	30	Adelosina intricata	1.95	1.1	NA	7040	90	7404	7514 to 7289	7616 to 7167
UAL21419	PIR2-30.Adel03	Piran 2	M53	25-30	30	Adelosina intricata	1.74	0.9	NA	2800	70	2446	2585 to 2319	2701 to 2190
UAL21420	PIR2-30.Adel04	Piran 2	M53	25-30	30	Adelosina intricata	1.92	1.8	NA	7580	100	7918	8042 to 7774	8180 to 7657
UAL21421	PIR2-30.Adel05	Piran 2	M53	25-30	30	Adelosina intricata	2.04	1.5	NA	7120	120	7477	7605 to 7338	7754 to 7201
UAL21422	PIR2-30.Adel06	Piran 2	M53	25-30	30	Adelosina intricata	2.08	1.5	NA	6720	130	7080	7253 to 6923	7400 to 6751
UAL21423	PIR2-30.Adel07	Piran 2	M53	25-30	30	Adelosina intricata	1.57	0.9	NA	4330	80	4346	4502 to 4207	4653 to 4050
UAL21424	PIR2-30.Adel08	Piran 2	M53	25-30	30	Adelosina intricata	1.67	0.7	NA	3200	60	2916	3020 to 2785	3156 to 2714
UAL21425	PIR2-30.Adel09	Piran 2	M53	25-30	30	Adelosina intricata	1.94	1.3	NA	6320	90	6635	6770 to 6491	6918 to 6365
UAL21426	PIR2-30.Adel10	Piran 2	M53	25-30	30	Adelosina intricata	1.61	0.7	NA	4280	70	4281	4413 to 4144	4544 to 3993
UAL21427	PIR2-30.Adel11	Piran 2	M53	25-30	30	Adelosina intricata	1.94	0.9	NA	7710	120	8057	8208 to 7909	8352 to 7765
UAL21428	PIR2-30.Adel12	Piran 2	M53	25-30	30	Adelosina intricata	1.83	0.9	NA	6360	120	6682	6845 to 6510	7010 to 6350
UAL21429	PIR2-30.Adel13	Piran 2	M53	25-30	30	Adelosina intricata	2.12	1.6	NA	7100	120	7459	7586 to 7320	7724 to 7174
UAL21430	PIR2-30.Adel14	Piran 2	M53	25-30	30	Adelosina intricata	1.66	0.7	NA	7180	150	7534	7690 to 7369	7869 to 7216
UAL21431	PIR2-30.Adel15	Piran 2	M53	25-30	30	Adelosina intricata	1.74	1	NA	7390	110	7732	7859 to 7596	7991 to 7475
UAL21432	PIR2-30.Adel16	Piran 2	M53	25-30	30	Adelosina intricata	1.77	0.9	NA	6790	100	7159	7295 to 7019	7417 to 6881
UAL21433	PIR2-30.Adel17	Piran 2	M53	25-30	30	Adelosina intricata	1.8	1.1	NA	3950	80	3844	3982 to 3690	4137 to 3558
UAL21434	PIR2-30.Adel18	Piran 2	M53	25-30	30	Adelosina intricata	1.78	1.3	NA	8260	130	8682	8877 to 8484	9059 to 8331
UAL21435	PIR2-30.Adel19	Piran 2	M53	25-30	30	Adelosina intricata	1.83	1.6	NA	7490	100	7827	7946 to 7694	8086 to 7573
UAL21436	PIR2-30.Adel20	Piran 2	M53	25-30	30	Adelosina intricata	2.31	2	NA	7480	100	7817	7937 to 7686	8073 to 7565
UAL21437	PIR2-30.Elph01	Piran 2	M53	25-30	30	Elphidium crispum	1.51	0.5	NA	1985	45	1445	1532 to 1346	1643 to 1270
UAL21438	PIR2-30.Elph02	Piran 2	M53	25-30	30	Elphidium crispum	1.6	0.9	NA	4910	90	5088	5251 to 4947	5379 to 4808
UAL21440	PIR2-30.Elph04	Piran 2	M53	25-30	30	Elphidium crispum	1.8	1.6	NA	3440	60	3213	3339 to 3102	3436 to 2968
UAL21441	PIR2-30.Elph05	Piran 2	M53	25-30	30	Elphidium crispum	1.65	1	NA	3210	120	2936	3091 to 2756	3304 to 2622
UAL21442	PIR2-30.Elph06	Piran 2	M53	25-30	30	Elphidium crispum	1.81	1.6	NA	3120	60	2826	2929 to 2720	3072 to 2606
UAL21443	PIR2-30.Elph07	Piran 2	M53	25-30	30	Elphidium crispum	1.97	1.9	NA	3410	80	3174	3323 to 3048	3433 to 2898
UAL21444	PIR2-30.Elph08	Piran 2	M53	25-30	30	Elphidium crispum	1.8	1.5	NA	1790	60	1244	1344 to 1149	1455 to 1040
UAL21445	PIR2-30.Elph09	Piran 2	M53	25-30	30	Elphidium crispum	1.79	1.3	NA	1850	45	1308	1398 to 1219	1502 to 1128
UAL21446	PIR2-30.Elph10	Piran 2	M53	25-30	30	Elphidium crispum	1.88	1.6	NA	3700	60	3527	3636 to 3403	3790 to 3309
UAL21447	PIR2-30.Elph11	Piran 2	M53	25-30	30	Elphidium crispum	2.41	3	NA	1840	45	1298	1384 to 1205	1493 to 1116
UAL21448	PIR2-30.Elph12	Piran 2	M53	25-30	30	Elphidium crispum	1.8	1.3	NA	5910	80	6192	6309 to 6060	6424 to 5935
UAL21449	PIR2-30.Elph13	Piran 2	M53	25-30	30	Elphidium crispum	1.68	1.1	NA	4570	100	4655	4816 to 4509	4970 to 4332
UAL21450	PIR2-30.Elph14	Piran 2	M53	25-30	30	Elphidium crispum	1.78	1.7	NA	3760	60	3599	3710 to 3467	3837 to 3370
UAL21451	PIR2-30.Elph15	Piran 2	M53	25-30	30	Elphidium crispum	1.68	1.1	NA	3050	90	2742	2893 to 2603	3031 to 2431
UAL21452	PIR2-30.Elph16	Piran 2	M53	25-30	30	Elphidium crispum	1.36	1	NA	3630	90	3444	3591 to 3306	3738 to 3154
UAL21453	PIR2-30.Elph17	Piran 2	M53	25-30	30	Elphidium crispum	1.73	1.3	NA	2770	60	2409	2543 to 2286	2670 to 2164
UAL21454	PIR2-30.Elph18	Piran 2	M53	25-30	30	Elphidium crispum	1.62	0.7	NA	3160	100	2876	3016 to 2728	3201 to 2583
UAL21455	PIR2-30.Elph19	Piran 2	M53	25-30	30	Elphidium crispum	1.86	1.3	NA	6070	100	6367	6498 to 6224	6657 to 6094
UAL21456	PIR2-30.Elph20	Piran 2	M53	25-30	30	Elphidium crispum	1.72	1.1	NA	6220	100	6525	6665 to 6382	6817 to 6262
UAL21457	PIR2-30.M1	Piran 2	M53	25-30	30	Psammechinus/Paracentrotus	2.52	3.2	NA	5070	70	5287	5436 to 5167	5540 to 5016
UAL21458	PIR2-30.M2	Piran 2	M53	25-30	30	Psammechinus/Paracentrotus	2.24	2.5	NA	4350	70	4373	4511 to 4236	4652 to 4087
UAL21459	PIR2-30.M3	Piran 2	M53	25-30	30	Psammechinus/Paracentrotus	1.95	1.5	NA	2555	50	2130	2258 to 2024	2336 to 1908
UAL21460	PIR2-30.M4	Piran 2	M53	25-30	30	Psammechinus/Paracentrotus	1.9	1.4	NA	2000	60	1462	1557 to 1349	1684 to 1279
UAL21461	PIR2-30.M5	Piran 2	M53	25-30	30	Psammechinus/Paracentrotus	1.81	1.1	NA	2635	50	2224	2331 to 2117	2453 to 1993
UAL21462	PIR2-30.M6	Piran 2	M53	25-30	30	Psammechinus/Paracentrotus	2.73	4.5	NA	7090	90	7450	7561 to 7340	7672 to 7226
UAL21463	PIR2-30.M7	Piran 2	M53	25-30	30	Psammechinus/Paracentrotus	2.01	1.6	NA	4540	70	4622	4774 to 4508	4858 to 4359
UAL21464	PIR2-30.M8	Piran 2	M53	25-30	30	Psammechinus/Paracentrotus	2.35	2.4	NA	6610	90	6968	7121 to 6838	7236 to 6697
UAL21465	PIR2-30.E1	Piran 2	M53	25-30	30	Echinocyamus pusillus	3.5	6.5	NA	6030	100	6325	6460 to 6188	6611 to 6035
UAL21466	PIR2-30.E2	Piran 2	M53	25-30	30	Echinocyamus pusillus	3.59	4.5	NA	5280	70	5514	5632 to 5400	5741 to 5288
UAL21467	PIR2-30.E3	Piran 2	M53	25-30	30	Echinocyamus pusillus	2.61	2.2	NA	5680	80	5951	6101 to 5832	6202 to 5690
UAL21468	PIR2-30.E4	Piran 2	M53	25-30	30	Echinocyamus pusillus	2.66	1.6	NA	5050	80	5258	5418 to 5126	5524 to 4966
UAL21469	PIR2-30.E5	Piran 2	M53	25-30	30	Echinocyamus pusillus	1.86	0.8	NA	7080	130	7440	7578 to 7296	7732 to 7149
UAL21470	PIR2-30.E6	Piran 2	M53	25-30	30	Echinocyamus pusillus	4.03	8.1	NA	2580	60	2160	2289 to 2052	2379 to 1910
UAL21471	PIR2-30.E7	Piran 2	M53	25-30	30	Echinocyamus pusillus	2.61	1.5	NA	3440	80	3211	3348 to 3079	3462 to 2928
UAL21472	PIR2-30.E8	Piran 2	M53	25-30	30	Echinocyamus pusillus	3.15	2.6	NA	1220	45	677	762 to 593	856 to 519
UAL21473	PIR2-30.E9	Piran 2	M53	25-30	30	Echinocyamus pusillus	2.02	0.9	NA	5660	80	5928	6060 to 5786	6183 to 5668
UAL21474	PIR2-30.E10	Piran 2	M53	25-30	30	Echinocyamus pusillus	2.86	2.4	NA	2720	50	2338	2457 to 2209	2605 to 2107
UAL21475	PIR2-30.E11	Piran 2	M53	25-30	30	Echinocyamus pusillus	2.45	1.1	NA	5550	100	5802	5931 to 5651	6107 to 5540
UAL21477	PIR2-30.C1	Piran 2	M53	25-30	30	Pilumnus sp.	3.716	3.1	NA	6650	80	7013	7148 to 6890	7254 to 6752
UAL21478	PIR2-30.C2	Piran 2	M53	25-30	30	Pilumnus sp.	3.464	2.4	NA	4790	90	4944	5108 to 4798	5264 to 4646
UAL21479	PIR2-30.C3	Piran 2	M53	25-30	30	Pilumnus sp.	3.059	3.5	NA	7220	90	7569	7674 to 7450	7805 to 7339
UAL21480	PIR2-30.C4	Piran 2	M53	25-30	30	Pilumnus sp.	5.522	12.9	NA	7520	100	7856	7979 to 7722	8125 to 7604
UAL21481	PIR2-30.C5	Piran 2	M53	25-30	30	Pilumnus sp.	3.986	3.7	NA	6880	200	7237	7457 to 7019	7652 to 6777
UAL21482	PIR2-30.C6	Piran 2	M53	25-30	30	Pilumnus sp.	9.292	22.9	NA	7150	90	7504	7619 to 7399	7728 to 7273
UAL21476	PIR2-30.C7	Piran 2	M53	25-30	30	Pilumnus sp.	6.899	70.4	NA	6220	100	6525	6665 to 6382	6817 to 6262
UAL21783	PIR2-25.Elph01	Piran 2	M53	20-25	25	Elphidium crispum	1.63	1.2	NA	2530	90	2098	2262 to 1966	2365 to 1794
UAL21784	PIR2-25.Elph02	Piran 2	M53	20-25	25	Elphidium crispum	2.02	2.6	NA	3490	60	3272	3386 to 3159	3494 to 3022
UAL21785	PIR2-25.Elph03	Piran 2	M53	20-25	25	Elphidium crispum	1.62	1.2	NA	5210	80	5441	5556 to 5322	5698 to 5193
UAL21786	PIR2-25.Elph04	Piran 2	M53	20-25	25	Elphidium crispum	1.58	0.7	NA	3090	60	2792	2904 to 2692	3032 to 2548
UAL21787	PIR2-25.Elph05	Piran 2	M53	20-25	25	Elphidium crispum	1.57	0.8	NA	3060	60	2756	2875 to 2653	2985 to 2500
UAL21788	PIR2-25.Elph06	Piran 2	M53	20-25	25	Elphidium crispum	1.74	1.2	NA	2330	50	1847	1950 to 1730	2071 to 1625
UAL21789	PIR2-25.Elph07	Piran 2	M53	20-25	25	Elphidium crispum	1.62	1.1	NA	3310	60	3050	3174 to 2925	3302 to 2813
UAL21790	PIR2-25.Elph08	Piran 2	M53	20-25	25	Elphidium crispum	1.46	0.7	NA	4080	100	4018	4179 to 3844	4357 to 3691
UAL21791	PIR2-25.Elph09	Piran 2	M53	20-25	25	Elphidium crispum	1.66	1.6	NA	5800	70	6078	6191 to 5960	6297 to 5857
UAL21792	PIR2-25.Elph10	Piran 2	M53	20-25	25	Elphidium crispum	1.78	1.1	NA	5260	80	5493	5598 to 5355	5742 to 5257
UAL21793	PIR2-25.Elph11	Piran 2	M53	20-25	25	Elphidium crispum	1.68	1.1	NA	1690	70	1144	1261 to 1049	1337 to 929
UAL21794	PIR2-25.Elph12	Piran 2	M53	20-25	25	Elphidium crispum	1.95	1.5	NA	6180	80	6481	6607 to 6356	6736 to 6252
UAL21795	PIR2-25.Elph13	Piran 2	M53	20-25	25	Elphidium crispum	1.87	1.4	NA	6120	90	6419	6542 to 6286	6686 to 6172
UAL21796	PIR2-25.Elph14	Piran 2	M53	20-25	25	Elphidium crispum	1.37	0.6	NA	2510	80	2073	2213 to 1930	2333 to 1807
UAL21797	PIR2-25.Elph15	Piran 2	M53	20-25	25	Elphidium crispum	1.49	0.9	NA	1670	50	1126	1236 to 1041	1294 to 935
UAL21798	PIR2-25.Elph16	Piran 2	M53	20-25	25	Elphidium crispum	1.7	1.3	NA	4170	70	4137	4271 to 3989	4405 to 3869
UAL21799	PIR2-25.Elph17	Piran 2	M53	20-25	25	Elphidium crispum	1.48	0.8	NA	2600	70	2183	2311 to 2063	2438 to 1921
UAL21801	PIR2-25.Elph19	Piran 2	M53	20-25	25	Elphidium crispum	1.53	0.7	NA	5050	110	5253	5432 to 5092	5561 to 4918
UAL21802	PIR2-25.Elph20	Piran 2	M53	20-25	25	Elphidium crispum	1.58	0.9	NA	1710	45	1166	1261 to 1080	1330 to 972
UAL21803	PIR2-30.Elph21	Piran 2	M53	25-30	30	Elphidium crispum	1.6	0.6	NA	6450	120	6785	6954 to 6619	7132 to 6466
UAL21824	PIR2-25.M1	Piran 2	M53	20-25	25	Psammechinus/Paracentrotus	2.3	2.5	NA	5690	80	5963	6108 to 5843	6212 to 5701
UAL21825	PIR2-25.M2	Piran 2	M53	20-25	25	Psammechinus/Paracentrotus	1.59	1	NA	2320	60	1836	1946 to 1714	2076 to 1602
UAL21826	PIR2-25.M3	Piran 2	M53	20-25	25	Psammechinus/Paracentrotus	2.15	2.3	NA	3830	60	3688	3815 to 3567	3930 to 3444
UAL21827	PIR2-25.M4	Piran 2	M53	20-25	25	Psammechinus/Paracentrotus	2.2	1.9	NA	4940	60	5123	5265 to 5007	5348 to 4854
UAL21828	PIR2-25.M5	Piran 2	M53	20-25	25	Psammechinus/Paracentrotus	2.41	1.8	NA	7010	90	7376	7488 to 7263	7597 to 7148
UAL21829	PIR2-25.M6	Piran 2	M53	20-25	25	Psammechinus/Paracentrotus	1.28	0.5	NA	2305	50	1817	1923 to 1707	2040 to 1598
UAL21844	PIR2-25.C1	Piran 2	M53	20-25	25	Pilumnus sp.	7.746	37.2	NA	4350	70	4373	4511 to 4236	4652 to 4087
UAL21845	PIR2-25.C2	Piran 2	M53	20-25	25	Pilumnus sp.	3.588	4.8	NA	1100	60	578	653 to 502	748 to 414
UAL21846	PIR2-25.C3	Piran 2	M53	20-25	25	Pilumnus sp.	4.14	5.2	NA	4100	60	4043	4165 to 3904	4318 to 3794
UAL21847	PIR2-25.C4	Piran 2	M53	20-25	25	Pilumnus sp.	4.366	8.6	NA	6690	90	7054	7192 to 6921	7307 to 6780
UAL21848	PIR2-25.C5	Piran 2	M53	20-25	25	Pilumnus sp.	3.619	3.1	NA	4280	60	4282	4405 to 4153	4527 to 4011
UAL21849	PIR2-25.C6	Piran 2	M53	20-25	25	Pilumnus sp.	3.562	2.6	NA	5460	70	5709	5823 to 5592	5924 to 5478
UAL21850	PIR2-25.C7	Piran 2	M53	20-25	25	Pilumnus sp.	2.987	1.6	NA	3710	80	3541	3671 to 3404	3824 to 3286
UAL21851	PIR2-25.C8	Piran 2	M53	20-25	25	Pilumnus sp.	4.82	6	NA	6330	80	6646	6774 to 6509	6910 to 6389
UAL21852	PIR2-25.C9	Piran 2	M53	20-25	25	Pilumnus sp.	4.612	3.4	NA	2805	50	2452	2566 to 2329	2696 to 2239
UAL21853	PIR2-25.C10	Piran 2	M53	20-25	25	Pilumnus sp.	3.482	2.1	NA	2700	60	2310	2427 to 2169	2591 to 2061
UAL21804	PIR2-25.Adel01	Piran 2	M53	20-25	25	Adelosina intricata	1.82	0.8	NA	7010	120	7374	7513 to 7243	7649 to 7090
UAL21805	PIR2-25.Adel02	Piran 2	M53	20-25	25	Adelosina intricata	1.74	1	NA	3750	60	3587	3697 to 3457	3828 to 3363
UAL21806	PIR2-25.Adel03	Piran 2	M53	20-25	25	Adelosina intricata	1.9	1.5	NA	4260	80	4255	4402 to 4113	4542 to 3958
UAL21807	PIR2-25.Adel04	Piran 2	M53	20-25	25	Adelosina intricata	1.75	1.5	NA	8140	110	8527	8682 to 8358	8893 to 8218
UAL21808	PIR2-25.Adel05	Piran 2	M53	20-25	25	Adelosina intricata	1.98	1.4	NA	5910	80	6192	6309 to 6060	6424 to 5935
UAL21809	PIR2-25.Adel06	Piran 2	M53	20-25	25	Adelosina intricata	1.78	0.9	NA	5460	110	5710	5863 to 5576	6006 to 5417
UAL21810	PIR2-25.Adel07	Piran 2	M53	20-25	25	Adelosina intricata	1.88	1.2	NA	6970	120	7337	7478 to 7202	7602 to 7034
UAL21811	PIR2-25.Adel08	Piran 2	M53	20-25	25	Adelosina intricata	1.95	1.1	NA	2750	70	2382	2525 to 2243	2666 to 2127
UAL21812	PIR2-25.Adel09	Piran 2	M53	20-25	25	Adelosina intricata	1.84	1	NA	6740	90	7106	7244 to 6981	7360 to 6834
UAL21813	PIR2-25.Adel10	Piran 2	M53	20-25	25	Adelosina intricata	2.05	1.4	NA	2920	60	2581	2710 to 2476	2778 to 2339
UAL21814	PIR2-25.Adel11	Piran 2	M53	20-25	25	Adelosina intricata	1.92	1.1	NA	3050	90	2742	2893 to 2603	3031 to 2431
UAL21815	PIR2-25.Adel12	Piran 2	M53	20-25	25	Adelosina intricata	1.88	1.5	NA	6060	110	6357	6496 to 6205	6658 to 6054
UAL21816	PIR2-25.Adel13	Piran 2	M53	20-25	25	Adelosina intricata	1.75	1.2	NA	4330	70	4346	4493 to 4217	4628 to 4069
UAL21817	PIR2-25.Adel14	Piran 2	M53	20-25	25	Adelosina intricata	1.71	1	NA	4490	70	4562	4694 to 4420	4819 to 4301
UAL21818	PIR2-25.Adel15	Piran 2	M53	20-25	25	Adelosina intricata	1.87	1.3	NA	8070	120	8446	8605 to 8275	8837 to 8128
UAL21819	PIR2-25.Adel16	Piran 2	M53	20-25	25	Adelosina intricata	2	1.6	NA	8490	140	8974	9200 to 8761	9383 to 8567
UAL21820	PIR2-25.Adel17	Piran 2	M53	20-25	25	Adelosina intricata	1.93	1	NA	6110	90	6409	6534 to 6278	6677 to 6162
UAL21821	PIR2-25.Adel18	Piran 2	M53	20-25	25	Adelosina intricata	2.15	2.3	NA	7100	130	7459	7596 to 7314	7745 to 7162
UAL21822	PIR2-25.Adel19	Piran 2	M53	20-25	25	Adelosina intricata	1.91	1.4	NA	4380	80	4415	4560 to 4261	4721 to 4116
UAL21823	PIR2-25.Adel20	Piran 2	M53	20-25	25	Adelosina intricata	2.03	1.9	NA	7360	110	7704	7833 to 7571	7959 to 7446
UAL21830	PIR2-25.E1	Piran 2	M53	20-25	25	Echinocyamus pusillus	1.785	0.6	NA	4070	100	4005	4166 to 3832	4348 to 3681
UAL21831	PIR2-25.E2	Piran 2	M53	20-25	25	Echinocyamus pusillus	1.598	0.5	NA	2440	70	1985	2114 to 1855	2260 to 1736
UAL21832	PIR2-25.E3	Piran 2	M53	20-25	25	Echinocyamus pusillus	4.837	7.5	NA	5170	80	5399	5529 to 5290	5642 to 5123
UAL21833	PIR2-25.E4	Piran 2	M53	20-25	25	Echinocyamus pusillus	1.955	0.6	NA	5240	80	5472	5580 to 5343	5724 to 5235
UAL21834	PIR2-25.E5	Piran 2	M53	20-25	25	Echinocyamus pusillus	3.376	5.1	NA	5540	80	5791	5906 to 5660	6053 to 5554
UAL21835	PIR2-25.E6	Piran 2	M53	20-25	25	Echinocyamus pusillus	3.44	6	NA	2730	60	2353	2481 to 2217	2632 to 2108
UAL21836	PIR2-25.E7	Piran 2	M53	20-25	25	Echinocyamus pusillus	2.8	2.3	NA	6000	100	6291	6437 to 6161	6568 to 5995
UAL21837	PIR2-25.E8	Piran 2	M53	20-25	25	Echinocyamus pusillus	3	3.8	NA	6360	120	6682	6845 to 6510	7010 to 6350
UAL21838	PIR2-25.E9	Piran 2	M53	20-25	25	Echinocyamus pusillus	2.234	1.3	NA	6030	100	6325	6460 to 6188	6611 to 6035
UAL21839	PIR2-25.E10	Piran 2	M53	20-25	25	Echinocyamus pusillus	2.09	1.1	NA	4530	70	4611	4766 to 4496	4849 to 4349
UAL21840	PIR2-25.E11	Piran 2	M53	20-25	25	Echinocyamus pusillus	2.778	1.7	NA	4810	70	4967	5096 to 4825	5259 to 4718
UAL21841	PIR2-25.E12	Piran 2	M53	20-25	25	Echinocyamus pusillus	2.643	2.5	NA	5710	80	5985	6123 to 5865	6236 to 5729
UAL21842	PIR2-25.E13	Piran 2	M53	20-25	25	Echinocyamus pusillus	2.342	1.4	NA	6020	110	6314	6465 to 6173	6611 to 6005
UAL21843	PIR2-25.E14	Piran 2	M53	20-25	25	Echinocyamus pusillus	1.789	0.5	NA	4650	70	4752	4872 to 4607	5029 to 4485
UAL22420	PIR2-30.O1	Piran 2	M53	25-30	30	Gobius niger	3.63	12.4	NA	6910	90	7283	7404 to 7170	7508 to 7019
UAL22421	PIR2-30.O2	Piran 2	M53	25-30	30	Gobius niger	3.527	12.5	NA	4440	80	4496	4647 to 4347	4797 to 4219
UAL22423	PIR2-30.O4	Piran 2	M53	25-30	30	Gobius niger	2.27	3.4	NA	5900	100	6181	6305 to 6026	6447 to 5903
UAL22426	PIR2-30.O7	Piran 2	M53	25-30	30	Gobius niger	2.148	2.9	NA	3450	60	3225	3349 to 3115	3445 to 2978
UAL22427	PIR2-30.O8	Piran 2	M53	25-30	30	Gobius niger	2.419	3.8	NA	4750	70	4891	5037 to 4763	5200 to 4618
UAL22429	PIR2-30.O10	Piran 2	M53	25-30	30	Gobius niger	1.778	1.5	NA	6420	90	6751	6894 to 6612	7033 to 6463
UAL22430	PIR2-30.O11	Piran 2	M53	25-30	30	Gobius niger	1.546	1.4	NA	4880	70	5053	5199 to 4916	5303 to 4813
UAL22431	PIR2-25.O1	Piran 2	M53	20-25	25	Gobius niger	4.176	16.8	NA	5120	90	5344	5493 to 5213	5591 to 5033
UAL22432	PIR2-25.O2	Piran 2	M53	20-25	25	Gobius niger	2.96	5.7	NA	5380	80	5625	5739 to 5490	5884 to 5385
UAL22433	PIR2-25.O3	Piran 2	M53	20-25	25	Gobius niger	3.959	16.4	NA	1935	50	1396	1484 to 1299	1597 to 1216
UAL22434	PIR2-25.O4	Piran 2	M53	20-25	25	Gobius niger	2.771	4.6	NA	2225	50	1721	1826 to 1608	1938 to 1511
UAL22435	PIR2-25.O5	Piran 2	M53	20-25	25	Gobius niger	2.68	4.7	NA	4060	60	3991	4116 to 3860	4246 to 3724
UAL22436	PIR2-25.O6	Piran 2	M53	20-25	25	Gobius niger	1.985	2.1	NA	6420	90	6751	6894 to 6612	7033 to 6463
UAL22437	PIR2-25.O7	Piran 2	M53	20-25	25	Gobius niger	1.678	1.4	NA	2270	60	1775	1897 to 1662	1999 to 1539
UAL22438	PIR2-25.O8	Piran 2	M53	20-25	25	Gobius niger	1.714	1.3	NA	6300	90	6612	6746 to 6469	6887 to 6338
UAL22440	PIR2-25.O10	Piran 2	M53	20-25	25	Gobius niger	2.539	4.6	NA	7290	110	7637	7767 to 7504	7915 to 7399
UAL22442	PIR2-30.Elph21a	Piran 2	M53	25-30	30	Elphidium crispum	1.78	0.9		4160	70	4124	4259 to 3978	4397 to 3859
UAL14816	Pir2 M53 25-30 01	Piran 2	M53	25-30	30	Corbula gibba	4.29	NA	7229	NA	NA	NA	NA	NA
UAL14817	Pir2 M53 25-30 02	Piran 2	M53	25-30	30	Corbula gibba	3.29	NA	5609	NA	NA	NA	NA	NA
UAL14818	Pir2 M53 25-30 03	Piran 2	M53	25-30	30	Corbula gibba	5.6	NA	5459	NA	NA	NA	NA	NA
UAL14819	Pir2 M53 25-30 04	Piran 2	M53	25-30	30	Corbula gibba	5.09	NA	7854	NA	NA	NA	NA	NA
UAL14820	Pir2 M53 25-30 05	Piran 2	M53	25-30	30	Corbula gibba	4.91	NA	4952	NA	NA	NA	NA	NA
UAL14821	Pir2 M53 25-30 06	Piran 2	M53	25-30	30	Corbula gibba	3.31	NA	5544	NA	NA	NA	NA	NA
UAL14822	Pir2 M53 25-30 07	Piran 2	M53	25-30	30	Corbula gibba	3.47	NA	8707	NA	NA	NA	NA	NA
UAL14823	Pir2 M53 25-30 08	Piran 2	M53	25-30	30	Corbula gibba	3.19	NA	4504	NA	NA	NA	NA	NA
UAL14824	Pir2 M53 25-30 09	Piran 2	M53	25-30	30	Corbula gibba	4.16	NA	6164	NA	NA	NA	NA	NA
UAL14825	Pir2 M53 25-30 10	Piran 2	M53	25-30	30	Corbula gibba	3.83	NA	6850	NA	NA	NA	NA	NA
UAL14826	Pir2 M53 25-30 11	Piran 2	M53	25-30	30	Corbula gibba	5.16	NA	3318	NA	NA	NA	NA	NA
UAL14827	Pir2 M53 25-30 12	Piran 2	M53	25-30	30	Corbula gibba	4.65	NA	4724	NA	NA	NA	NA	NA
UAL14828	Pir2 M53 25-30 13	Piran 2	M53	25-30	30	Corbula gibba	4.95	NA	7823	NA	NA	NA	NA	NA
UAL14829	Pir2 M53 25-30 14	Piran 2	M53	25-30	30	Corbula gibba	4.89	NA	8119	NA	NA	NA	NA	NA
UAL14830	Pir2 M53 25-30 15	Piran 2	M53	25-30	30	Corbula gibba	5.84	NA	5177	NA	NA	NA	NA	NA
UAL14831	Pir2 M53 25-30 16	Piran 2	M53	25-30	30	Corbula gibba	4.68	NA	5695	NA	NA	NA	NA	NA
UAL14832	Pir2 M53 25-30 17	Piran 2	M53	25-30	30	Corbula gibba	3.96	NA	7406	NA	NA	NA	NA	NA
UAL14833	Pir2 M53 25-30 18	Piran 2	M53	25-30	30	Corbula gibba	5.05	NA	4313	NA	NA	NA	NA	NA
UAL14834	Pir2 M53 25-30 19	Piran 2	M53	25-30	30	Corbula gibba	3.35	NA	3497	NA	NA	NA	NA	NA
UAL14835	Pir2 M53 25-30 20	Piran 2	M53	25-30	30	Corbula gibba	3.3	NA	6124	NA	NA	NA	NA	NA
UAL14836	Pir2 M53 25-30 21	Piran 2	M53	25-30	30	Corbula gibba	4	NA	8044	NA	NA	NA	NA	NA
UAL14837	Pir2 M53 25-30 22	Piran 2	M53	25-30	30	Corbula gibba	3.84	NA	5194	NA	NA	NA	NA	NA
UAL14838	Pir2 M53 25-30 23	Piran 2	M53	25-30	30	Corbula gibba	4.03	NA	6172	NA	NA	NA	NA	NA
UAL14839	Pir2 M53 25-30 24	Piran 2	M53	25-30	30	Corbula gibba	3.71	NA	5340	NA	NA	NA	NA	NA
UAL14840	Pir2 M53 25-30 25	Piran 2	M53	25-30	30	Corbula gibba	3.81	NA	8917	NA	NA	NA	NA	NA
UAL10784A	PiranII M53-25-30-001	Piran 2	M53	25-30	30	Gouldia minima	4.56	NA	3662	NA	NA	NA	NA	NA
UAL10784AA	PiranII M53-25-30-027	Piran 2	M53	25-30	30	Gouldia minima	4.55	NA	2765	NA	NA	NA	NA	NA
UAL10784AB	PiranII M53-25-30-028	Piran 2	M53	25-30	30	Gouldia minima	3.25	NA	3362	NA	NA	NA	NA	NA
UAL10784AC	PiranII M53-25-30-029	Piran 2	M53	25-30	30	Gouldia minima	3.19	NA	3910	NA	NA	NA	NA	NA
UAL10784AD	PiranII M53-25-30-030	Piran 2	M53	25-30	30	Gouldia minima	2.86	NA	5765	NA	NA	NA	NA	NA
UAL10784B	PiranII M53-25-30-002	Piran 2	M53	25-30	30	Gouldia minima	5.34	NA	5365	NA	NA	NA	NA	NA
UAL10784C	PiranII M53-25-30-003	Piran 2	M53	25-30	30	Gouldia minima	4.48	NA	4651	NA	NA	NA	NA	NA
UAL10784D	PiranII M53-25-30-004	Piran 2	M53	25-30	30	Gouldia minima	6.18	NA	4918	NA	NA	NA	NA	NA
UAL10784E	PiranII M53-25-30-005	Piran 2	M53	25-30	30	Gouldia minima	4.06	NA	2355	NA	NA	NA	NA	NA
UAL10784F	PiranII M53-25-30-006	Piran 2	M53	25-30	30	Gouldia minima	2.31	NA	3003	NA	NA	NA	NA	NA
UAL10784G	PiranII M53-25-30-007	Piran 2	M53	25-30	30	Gouldia minima	2.74	NA	3157	NA	NA	NA	NA	NA
UAL10784H	PiranII M53-25-30-008	Piran 2	M53	25-30	30	Gouldia minima	3.41	NA	4912	NA	NA	NA	NA	NA
UAL10784I	PiranII M53-25-30-009	Piran 2	M53	25-30	30	Gouldia minima	4.06	NA	3060	NA	NA	NA	NA	NA
UAL10784J	PiranII M53-25-30-010	Piran 2	M53	25-30	30	Gouldia minima	3.78	NA	3650	NA	NA	NA	NA	NA
UAL10784K	PiranII M53-25-30-011	Piran 2	M53	25-30	30	Gouldia minima	8.27	NA	3288	NA	NA	NA	NA	NA
UAL10784L	PiranII M53-25-30-012	Piran 2	M53	25-30	30	Gouldia minima	8.2	NA	2299	NA	NA	NA	NA	NA
UAL10784M	PiranII M53-25-30-013	Piran 2	M53	25-30	30	Gouldia minima	2.81	NA	3496	NA	NA	NA	NA	NA
UAL10784N	PiranII M53-25-30-014	Piran 2	M53	25-30	30	Gouldia minima	2.61	NA	5937	NA	NA	NA	NA	NA
UAL10784O	PiranII M53-25-30-015	Piran 2	M53	25-30	30	Gouldia minima	2.85	NA	3579	NA	NA	NA	NA	NA
UAL10784P	PiranII M53-25-30-016	Piran 2	M53	25-30	30	Gouldia minima	2.37	NA	5017	NA	NA	NA	NA	NA
UAL10784Q	PiranII M53-25-30-017	Piran 2	M53	25-30	30	Gouldia minima	3.37	NA	4868	NA	NA	NA	NA	NA
UAL10784R	PiranII M53-25-30-018	Piran 2	M53	25-30	30	Gouldia minima	5.87	NA	2240	NA	NA	NA	NA	NA
UAL10784S	PiranII M53-25-30-019	Piran 2	M53	25-30	30	Gouldia minima	2.56	NA	4611	NA	NA	NA	NA	NA
UAL10784T	PiranII M53-25-30-020	Piran 2	M53	25-30	30	Gouldia minima	2.45	NA	6792	NA	NA	NA	NA	NA
UAL10784U	PiranII M53-25-30-021	Piran 2	M53	25-30	30	Gouldia minima	3.19	NA	5960	NA	NA	NA	NA	NA
UAL10784V	PiranII M53-25-30-022	Piran 2	M53	25-30	30	Gouldia minima	2.93	NA	6081	NA	NA	NA	NA	NA
UAL10784W	PiranII M53-25-30-023	Piran 2	M53	25-30	30	Gouldia minima	2.32	NA	2366	NA	NA	NA	NA	NA
UAL10784X	PiranII M53-25-30-024	Piran 2	M53	25-30	30	Gouldia minima	2.53	NA	4289	NA	NA	NA	NA	NA
UAL10784Y	PiranII M53-25-30-025	Piran 2	M53	25-30	30	Gouldia minima	2.09	NA	3523	NA	NA	NA	NA	NA
UAL10784Z	PiranII M53-25-30-026	Piran 2	M53	25-30	30	Gouldia minima	3.13	NA	7016	NA	NA	NA	NA	NA
Nawrot, R., et al., 2022, Multiple phyla, one time resolution? Similar time averaging in benthic foraminifera, mollusk, echinoid, crustacean, and otolith fossil assemblages: Geology, v. 50, https://doi.org/10.1130/G49970.1
